# Supplementary material for: Adsorption and Desorption Behavior and Mechanism of Ruthenium in Nitrite–Nitric Acid System
Source: MDPI journal article supplement (doi:10.3390/toxics12030181), 2024-02-27
Supplement: s1 [file s1]

**Table S1.** Kinetic parameters of SiPyR-N3 adsorption of Ru in nitric acid system in nitric acid-nitrite system at 298, 308, 318 K

| system                        | T<br>(K) | Pseudo-first-order model    |                                |       | Pseudo-second-order model                      |                                |       | $Q_{e,exp}$<br>(mg/g) |
|-------------------------------|----------|-----------------------------|--------------------------------|-------|------------------------------------------------|--------------------------------|-------|-----------------------|
|                               |          | $K_1$<br>(h <sup>-1</sup> ) | $Q_e$<br>(mg g <sup>-1</sup> ) | $R^2$ | $K_2$<br>(g mg <sup>-1</sup> h <sup>-1</sup> ) | $Q_e$<br>(mg g <sup>-1</sup> ) | $R^2$ |                       |
| Nitric acid                   | 298      | 4.49                        | 1.53                           | 0.556 | 1.03                                           | 1.91                           | 0.999 | 1.89                  |
|                               | 308      | 5.72                        | 1.82                           | 0.675 | 1.54                                           | 2.18                           | 0.999 | 2.17                  |
|                               | 318      | 1.95                        | 2.06                           | 0.676 | 1.06                                           | 2.47                           | 0.999 | 2.45                  |
| Nitric acid<br>sodium nitrite | 298      | 4.03                        | 8.43                           | 0.642 | 6.83                                           | 8.58                           | 0.999 | 8.57                  |
|                               | 308      | 2.83                        | 8.89                           | 0.328 | 4.04                                           | 9.01                           | 0.999 | 8.96                  |
|                               | 318      | 2.49                        | 9.09                           | 0.913 | 8.55                                           | 9.21                           | 0.999 | 9.18                  |

**Table S2.** The adsorption isotherm parameters of two adsorption models for Ru on SiPyR-N3 in two systems at 298, 308, and 318 K

| system                        | T<br>(K) | Langmuir isotherm              |                                |       | Freundlich isotherm |                                                              |       | $Q_{e,exp}$<br>(mg g <sup>-1</sup> ) |
|-------------------------------|----------|--------------------------------|--------------------------------|-------|---------------------|--------------------------------------------------------------|-------|--------------------------------------|
|                               |          | $Q_m$<br>(mg g <sup>-1</sup> ) | $K_L$<br>(L mg <sup>-1</sup> ) | $R^2$ | N                   | $K_F$<br>(mg <sup>1-n</sup> L <sup>n</sup> g <sup>-1</sup> ) | $R^2$ |                                      |
| Nitric acid                   | 318      | 11.99                          | 6.89                           | 0.944 | 1.59                | 0.31                                                         | 0.901 | 11.94                                |
|                               | 308      | 11.90                          | 9.43                           | 0.966 | 1.47                | 0.13                                                         | 0.924 | 11.23                                |
|                               | 298      | 9.42                           | 2.36                           | 0.964 | 1.43                | 0.11                                                         | 0.917 | 9.88                                 |
| Nitric acid<br>sodium nitrite | 318      | 45.70                          | 0.02                           | 0.984 | 4.39                | 7.59                                                         | 0.867 | 45.57                                |
|                               | 308      | 34.33                          | 0.01                           | 0.994 | 4.65                | 6.18                                                         | 0.852 | 33.97                                |
|                               | 298      | 30.86                          | 0.01                           | 0.998 | 4.76                | 5.33                                                         | 0.874 | 30.57                                |

**Table S3.** Thermodynamic parameters of Ru adsorption on SiPyR-N3 in nitric acid system in nitric acid-nitrite system

| T (K) | Nitric acid                             |                             |                                         | Nitric acid sodium nitrite              |                             |                                         |
|-------|-----------------------------------------|-----------------------------|-----------------------------------------|-----------------------------------------|-----------------------------|-----------------------------------------|
|       | $\Delta H^0$<br>(kJ mol <sup>-1</sup> ) | $\Delta S^0$<br>J/(mol · K) | $\Delta G^0$<br>(kJ mol <sup>-1</sup> ) | $\Delta H^0$<br>(kJ mol <sup>-1</sup> ) | $\Delta S^0$<br>J/(mol · K) | $\Delta G^0$<br>(kJ mol <sup>-1</sup> ) |
| 298   |                                         |                             | -7.15                                   |                                         |                             | -13.89                                  |
| 308   | 8.86                                    | 53.79                       | -7.71                                   | 21.24                                   | 117.89                      | -15.07                                  |
| 318   |                                         |                             | -8.25                                   |                                         |                             | -16.25                                  |
| 328   |                                         |                             | -8.78                                   |                                         |                             | -17.43                                  |

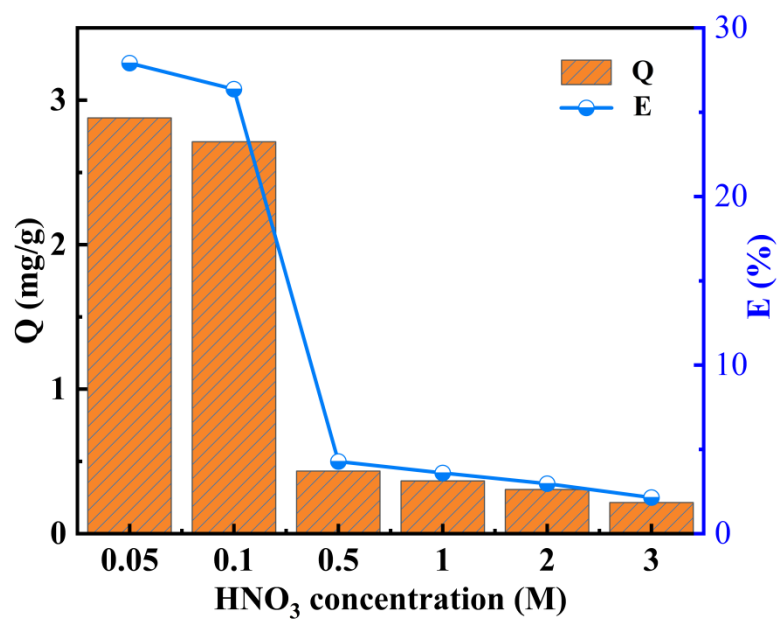

**Figure S1.** Effect of initial HNO<sub>3</sub> concentration on adsorption. ( $m/V = 0.02 \text{ g mL}^{-1}$ ,  $C_{\text{Ru}} = 2 \text{ mmol L}^{-1}$ ,  $T = 298 \text{ K}$ ).

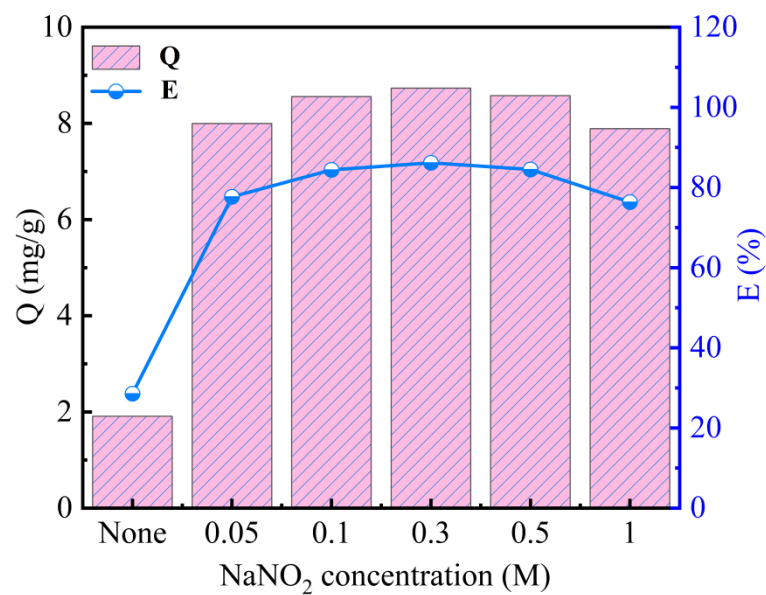

**Figure S2.** Effect of initial NaNO<sub>2</sub> concentration on adsorption. ( $m/V = 0.02 \text{ g mL}^{-1}$ ,  $C_{\text{Ru}} = 2 \text{ mmol L}^{-1}$ ,  $C_{\text{HNO}_3} = 0.1 \text{ mol L}^{-1}$ ,  $T = 298 \text{ K}$ ).
